# Supplementary material for: Efficient biocatalytic processes for highly valuable terminally phosphorylated C5 to C9d-ketoses
Source: Royal Society of Chemistry journal article supplement (doi:10.1039/c3gc42140f), 2013-11-26
Supplement: c3gc42140f.pdf [file c3gc42140f.pdf]

# Efficient biocatalytic processes for highly valuable terminally phosphorylated C5 to C9 D-ketoses

C. Guérard-Hélaine,<sup>a,b</sup> M. Debacker,<sup>a,b</sup> P. Clapés,<sup>c</sup> A. Szekrenyi,<sup>c</sup> V. Hélaine\*<sup>a,b</sup> and M. Lemaire\*<sup>a,b</sup>

<sup>a</sup> Clermont Université, Université Blaise Pascal, ICCF, BP 10448, F-63000 Clermont-Ferrand, France.

<sup>b</sup> CNRS, UMR 6296, ICCF, F-63177 Aubière, France.

E-mail: [marielle.lemaire@univ-bpclermont.fr](mailto:marielle.lemaire@univ-bpclermont.fr)

<sup>c</sup> Biotransformation and Bioactive Molecules Group, Instituto de Química Avanzada de Cataluña – IQAC-CSIC, Jordi Girona, 18-26, 08034 Barcelona, Spain

## Supplementary Information

### Table of contents

|     |                                                                                                                    |    |
|-----|--------------------------------------------------------------------------------------------------------------------|----|
| 1   | General remarks .....                                                                                              | 2  |
| 2   | Kinetic measurements .....                                                                                         | 2  |
| 2.1 | General considerations .....                                                                                       | 2  |
| 2.2 | FSA kinetic parameters for glycolaldehyde phosphate 4, hydroxyacetone 2 being the donor substrate .....            | 3  |
| 2.3 | FSA deactivation by glycolaldehyde phosphate .....                                                                 | 3  |
| 2.4 | Ribose-5-phosphate isomerase (RPI) and Ribulose-5-phosphate epimerase (RPE) activity detection .....               | 3  |
| 2.5 | Ribose-5-phosphate isomerase (RPI) activity estimation <sup>5</sup> .....                                          | 3  |
| 2.6 | Ribulose-5-phosphate epimerase (RPE) activity estimation <sup>5</sup> .....                                        | 4  |
| 3   | General procedure 1 for FSA biocatalysed one pot / one step reactions .....                                        | 4  |
| 4   | General procedure 2 for FSA A129S biocatalysed one pot / four steps reaction .....                                 | 4  |
| 5   | Synthesis and analytical data .....                                                                                | 5  |
| 5.1 | D-xylulose-5-phosphate 5 .....                                                                                     | 5  |
| 5.2 | 1-deoxy-D-xylulose-5-phosphate 6 .....                                                                             | 5  |
| 5.3 | (2 <i>S</i> ,3 <i>R</i> ) 2,3-dihydroxy-4-oxohexyl phosphate 7 .....                                               | 6  |
| 5.4 | D-glycero-D- <i>altro</i> -octulose-8-phosphate 9 .....                                                            | 7  |
| 5.5 | 1-deoxy-D-glycero-D- <i>altro</i> -octulose-8-phosphate 10 .....                                                   | 8  |
| 5.6 | (2 <i>R</i> ,3 <i>R</i> ,4 <i>R</i> ,5 <i>R</i> ,6 <i>S</i> )-2,3,4,5,6-pentahydroxy-7-oxononyl phosphate 11 ..... | 9  |
| 6   | Scheme illustrating arabinose-5-phosphate conversion by FSA wild-type .....                                        | 10 |
| 7   | References .....                                                                                                   | 11 |

## 1 General remarks

**Material and methods:** Dihydroxyacetone **1**, glycolaldehyde and 1-hydroxybutan-2-one **3** were purchased from Sigma-Aldrich. Hydroxyacetone **2** was purchased from Fluka (purity 90%) and purified by silica gel chromatography. D-fructose-6-phosphate dipotassium salt, D,L-glyceraldehyde 3-phosphate diethyl acetal barium salt and phosphoriboisomerase (RPI) from spinach were purchased from Sigma-Aldrich. FSA was produced as previously reported.<sup>1</sup> A desalting step by gel filtration is necessary to remove glycylglycine (Gly-Gly) buffer. Glycerol dehydrogenase was obtained as described by A.K. Samland<sup>2</sup> and glycolaldehyde phosphate was obtained as described<sup>3</sup>.

Nuclear magnetic resonance (NMR) spectra were measured in deuterated solvent (D<sub>2</sub>O) on a Bruker AC-400 spectrometer, operating at 400 MHz for <sup>1</sup>H and 100 MHz for <sup>13</sup>C nuclei. Residual solvent signals were used as internal reference. Chemical shifts ( $\delta$ ) are reported in ppm, coupling constant values ( $J$ ) are given in hertz. Acyclic sugar phosphates were recorded as their barium salt in D<sub>2</sub>O, adding the minimum amount of 12N HCl solution to fully dissolve the compound. Sugar phosphates able to cyclise were recorded in D<sub>2</sub>O after barium to ammonium prior exchange, in order to avoid chemical shifts changes due to pH for easier comparison with literature data.

Optical rotations were measured on a Jasco DIP-370 polarimeter, using a 10 cm quartz cell. Values for  $[\alpha]_D^T$  were obtained with the D-ray of sodium at the indicated temperature T, using solutions of concentration ( $c$ ) in units of g/100 mL. High resolution electrospray ionization mass spectra (ESI-HRMS) were recorded on a micro q-tof Micromass (3000 V) with an internal lock mass (H<sub>3</sub>PO<sub>4</sub>) and an external lock mass (Leu-enkephalin).

## 2 Kinetic measurements

### 2.1 General considerations

In kinetic assays, one unit (U) of FSA is defined as the amount of enzyme able to cleave 1  $\mu$ mol of D-fructose-6-phosphate (D-F6P) to afford D-glyceraldehyde-3-phosphate (D-G3P) and dihydroxyacetone (DHA) per minute at pH 8.5 (glycylglycine 50 mM buffer) and 25°C.

In addition one unit (U) of RPI is defined as the amount of enzyme able to transform 1  $\mu$ mol of D-ribose-5-phosphate (D-R5P) per minute whereas one unit (U) of RPE is defined as the amount of enzyme able to transform 1  $\mu$ mol of D-ribulose-5-phosphate (D-Ru5P) per minute, both at pH 7.5 and 25°C.

## 2.2 FSA kinetic parameters for glycolaldehyde phosphate **4**, hydroxyacetone **2** being the donor substrate

The reaction consisted in the formation of 1-deoxy-D-xylulose-5-phosphate **6** and measurement of **2** consumption was done with glycerol dehydrogenase. To a solution of **4** (concentrations from 50 to 300 mM) and 70 mM of **2** in 50 mM Gly-Gly buffer pH 8 at 25 °C, wt-FSA (2 U) was added, final volume being 1 mL. Aliquots were withdrawn at different times (t=0, 5, 10 and 15 minutes) and the remaining amount of **2** was determined using GDH enzyme (10 U) in the presence of NADH (0.7 mM). One mmol of NADH oxidized was equivalent to 1 mmol of remaining **2**. All these experiments were done in triplicate.

## 2.3 FSA deactivation by glycolaldehyde phosphate

FSA deactivation by glycolaldehyde phosphate was evaluated compared to a control consisting of FSA without any substrate. Thus a solution of 100 mM of glycolaldehyde phosphate was incubated with 10 U of FSA in a final volume of 1 mL. Aliquots were withdrawn after 7 and 28 hours and FSA activity was measured using the already published assay (F6P cleavage).<sup>4</sup>

## 2.4 Ribose-5-phosphate isomerase (RPI) and Ribulose-5-phosphate epimerase (RPE) activity detection

Four samples were prepared each containing 500 µL of a solution of **8** (50 mg in 1 mL Gly-Gly buffer pH 8, 50 mM). FSA A129S purified by a 70°C heat treatment during 20 minutes (50 U) was added to the first one whereas the second one was loaded with FSA A129S purified by a 70°C heat treatment during 30 minutes (50 U). The third one was loaded with His-tagged FSA A129S purified by IMAC (50 U). The last one was the control since it didn't contain any FSA.

After 12 hours <sup>13</sup>C NMR spectra was recorded and analysed.

## 2.5 Ribose-5-phosphate isomerase (RPI) activity estimation<sup>5</sup>

10 mg (50 U) of FSA A129S (purified by a 70°C heat treatment during 20 or 30 minutes) were incubated in 500 µL of D<sub>2</sub>O with 5 µL of DMF (internal reference) and 500 µL of a solution of **8** (50 mg in 1 mL of D<sub>2</sub>O). <sup>1</sup>H NMR spectra were recorded upon time and disappearance of **8** was quantified at t=0, 90 and 330 minutes following the decrease of the H-1 signals of the α and β forms, in comparison to the signal of the internal reference. This experiment was duplicated.

## 2.6 Ribulose-5-phosphate epimerase (RPE) activity estimation<sup>5</sup>

The experimental conditions were the same as mentioned above but the solution of **8** was pre-incubated with 5 units of a commercially available phosphoriboisomerase for 20 minutes (till the equilibrium between **8** and **12** was reached). Appearance of **5** was followed by <sup>1</sup>H NMR upon time at t=0 and 20 minutes following the increase of the H-1 signal in comparison to the signal of the internal reference. This experiment was triplicated. We noted that this signal was detected as a singlet due to a deuterium exchange.

## 3 General procedure 1 for FSA biocatalysed one pot / one step reactions

The reactions were carried out mixing glycolaldehyde phosphate **4** (700 mM solution in water, pH 7.5) or D-ribose-5-phosphate **8** and **1**, **2** or **3** (2 eq.) in a final water volume corresponding to a 100 mM concentration of **4** or 50 mM of **8**. The reactions were initiated upon addition of FSA A129S or wt-FSA partially purified by heat treatment (45 minutes at 70°C) and allowed to gentle stir (100-200 rpm) at room temperature for 24 hours. The final compound was isolated as its barium salt as follows. The reaction mixture was first adjusted to pH 3 with a 1N HCl solution and then to pH 6 with a 1N NaOH solution. The suspension obtained was centrifuged and 2 equivalents of BaCl<sub>2</sub> · 2H<sub>2</sub>O were added to the supernatant. 6 volumes of ethanol were poured and the mixture allowed cooling at 4°C for at least 1 hour. The suspension was centrifuged and the precipitate was washed twice with ethanol and acetone, and dried under vacuum. For the reactions achieved with **8** as acceptor substrate, barium counter ion of the final ketose was exchanged to ammonium using a Dowex 50WX8 ammonium form ion exchange resin.

## 4 General procedure 2 for FSA A129S biocatalysed one pot / four steps reaction

The reaction was carried out mixing **4** (700 mM solution in water, pH 7.5) and **1** (2.1 eq.) in a final water volume corresponding to a 50 mM concentration of **4**. The reaction was initiated upon addition of 150 U of FSA A129S partially purified by heat treatment (30 minutes at 70°C) followed by a PD10 desalting column to remove Gly-Gly buffer. The resulting mixture was then allowed to gently stir (100-200 rpm) at room temperature for 60 hours. The final compound was isolated as its barium salt as follows. The reaction mixture was first adjusted to pH 3 with a 1N HCl solution and then to pH 6 with a 1N NaOH solution. The suspension obtained was centrifuged and 2 equivalents of BaCl<sub>2</sub> · 2H<sub>2</sub>O were added to the supernatant. 6 volumes of ethanol were poured and the mixture allowed cooling at 4°C for at least 1 hour. The suspension was centrifuged and the precipitate was washed twice with

ethanol and acetone, and dried under vacuum. Barium counter ion from the final ketose was exchanged to ammonium using a Dowex 50WX8 ammonium form ion exchange resin.

## 5 Synthesis and analytical data

### 5.1 D-xylulose-5-phosphate 5

According to general procedure 1, 400  $\mu$ L of a 700 mM **4** solution in water was added to 52 mg of **1** in 2.4 mL of water. The reaction was initiated by adding 175U of FSA A129S. After workup and purification, 92 mg of compound **5** was obtained as its barium salt (89% yield).

$^1\text{H}$  NMR (400 MHz,  $\text{D}_2\text{O}+\text{HCl}$ )  $\delta$  4.73 (d, 1H,  $J=19.4$  Hz, H-1a), 4.57 (d, 1H,  $J=15.3$  Hz, H-1b), 4.59 (d, 1H,  $J=1.8$  Hz, H-3), 4.24 (td, 1H,  $J=2.1, 6.4$  Hz, H-4), 3.90-3.93 (m, 2H, H-5).

$^{13}\text{C}$  NMR (100 MHz,  $\text{D}_2\text{O}+\text{HCl}$ )  $\delta$  213.14 (C-2), 75.22 (C-3), 71.03 (d,  $J=6.6$  Hz, C-4), 66.05 (C-1), 64.23 (d,  $J=4.8$  Hz, C-5);  $^1\text{H}$  and  $^{13}\text{C}$  NMR were identical to those from the literature<sup>6</sup>.

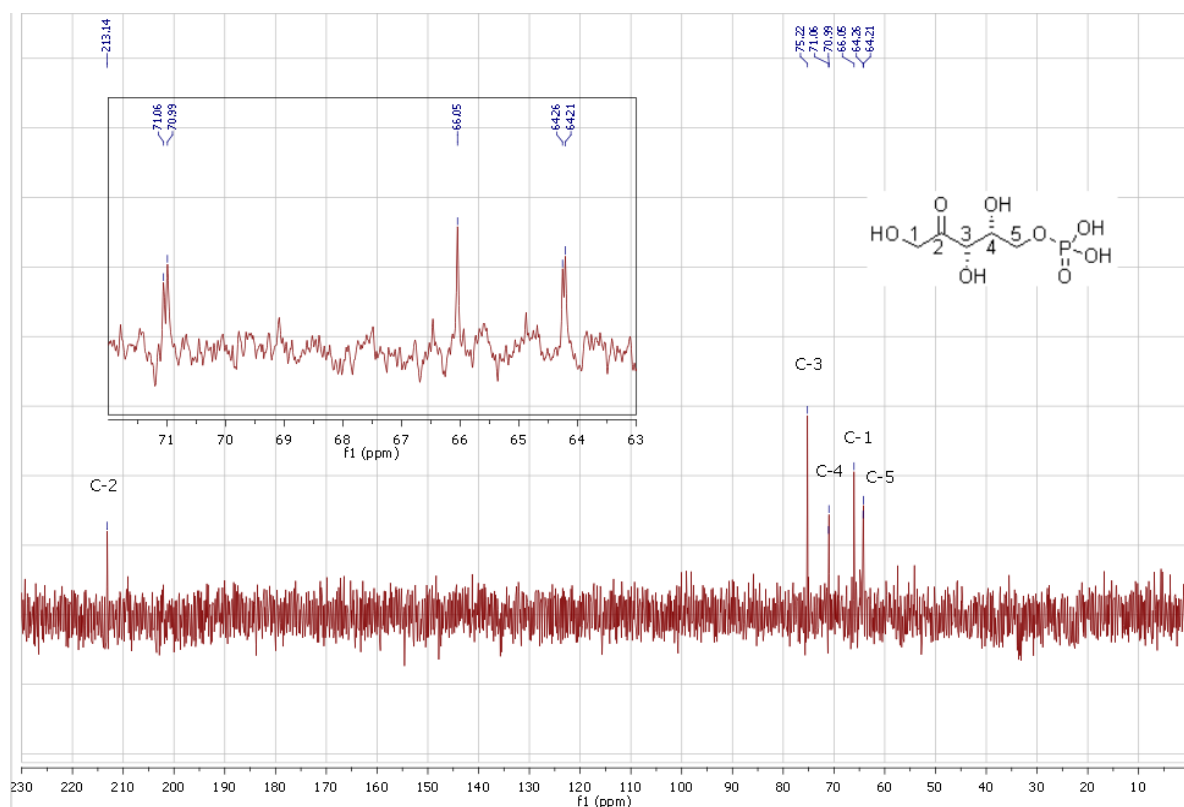

### 5.2 1-deoxy-D-xylulose-5-phosphate 6

According to general procedure 1, 2.6 mL of a 700 mM **4** solution in water was added to 185  $\mu$ L of **2** in 15.4 mL of water. The reaction was initiated by adding 80U of wt-FSA. After workup and purification, 385 mg of compound **6** was obtained as its barium salt (85% yield).

$^1\text{H}$  NMR (400 MHz,  $\text{D}_2\text{O}+\text{HCl}$ )  $\delta$  4.22 (d, 1H,  $J=1.8$  Hz, H-3), 4.16-4.09 (td, 1H,  $J=1.8$ , 6.7 Hz, H-4), 3.72 (m, 2H, H-5), 2.05 (s, 3H, H-1).

$^{13}\text{C}$  NMR (100 MHz,  $\text{D}_2\text{O}+\text{HCl}$ )  $\delta$  212.76 (C-2), 76.79 (C-3), 70.06 (d,  $J=8.0$  Hz, C-4), 65.48 (d,  $J=5.2$  Hz, C-5), 25.76 (C-1).

HRMS (ESI); calculated for  $[\text{C}_5\text{H}_{10}\text{O}_7\text{P}]$ : 213.0242, found: 213.0168

$[\alpha]_{\text{D}}^{25} = +15.5$  ( $c=2$ ,  $\text{HCl}$  1N).

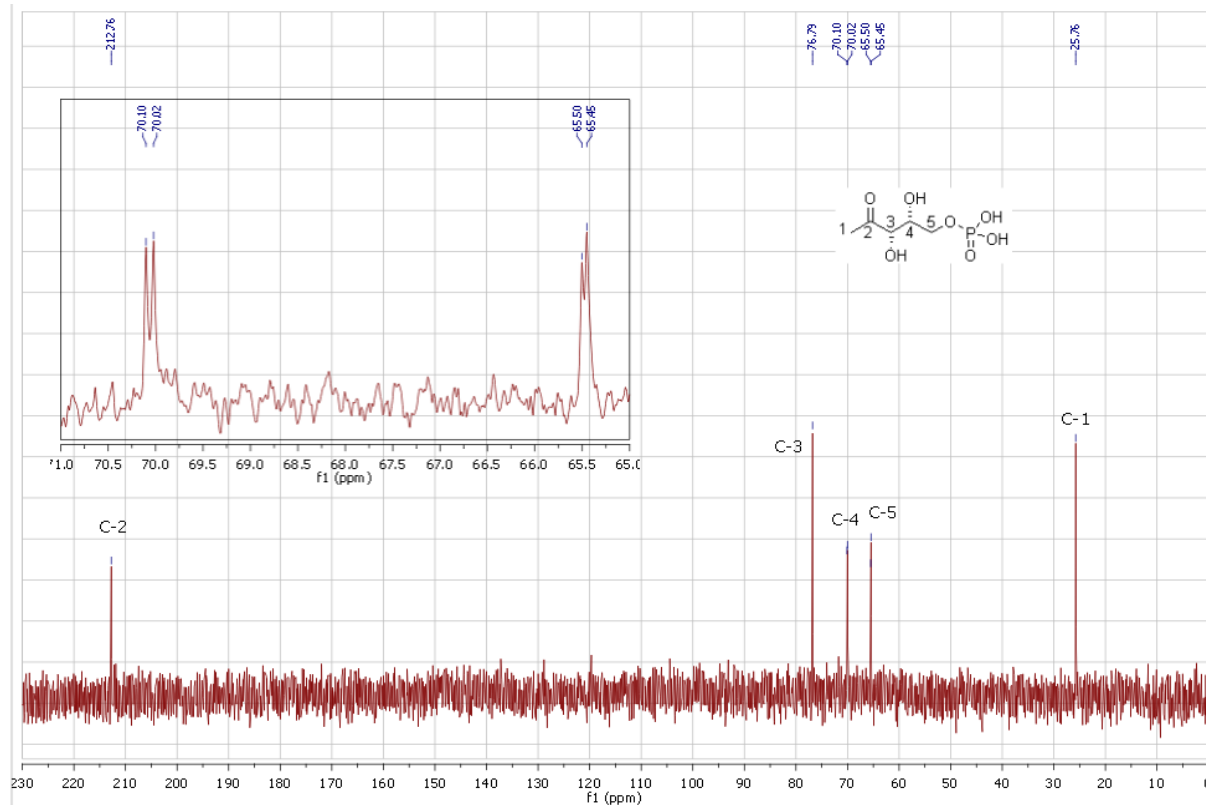

### 5.3 (2*S*,3*R*) 2,3-dihydroxy-4-oxohexyl phosphate 7

According to general procedure 1, 2.6 mL of a 700 mM **4** solution in water was added to 230  $\mu\text{L}$  of **3** in 15.4 mL of water. The reaction was initiated by adding 80U of wt-FSA. After workup and purification, 336 mg of compound **7** was obtained as its barium salt (77% yield).

$^1\text{H}$  NMR (400 MHz,  $\text{D}_2\text{O}+\text{HCl}$ )  $\delta$  4.34 (d, 1H,  $J=2.0$  Hz, H-4), 4.31 (td, 1H,  $J=2.0$ , 6.9 Hz, H-5), 3.95 (m, 1H, H-6), 2.66 (m, 2H, H-2), 1.03 (t, 3H,  $J=7.2$  Hz, H-1).

$^{13}\text{C}$  NMR (100 MHz,  $\text{D}_2\text{O}+\text{HCl}$ )  $\delta$  215.54 (C-3), 76.31 (C-4), 70.32 (d,  $J=8.2$  Hz, C-5), 65.60 (d,  $J=5.0$  Hz, C-6), 31.91 (C-2), 6.76 (C-1).

HRMS (ESI); calculated for  $[\text{C}_6\text{H}_{12}\text{O}_7\text{P}]$ : 227.0399, found: 227.0328

$[\alpha]_{\text{D}}^{25} = +14.40$  ( $c=2$ ,  $\text{HCl}$  1N)

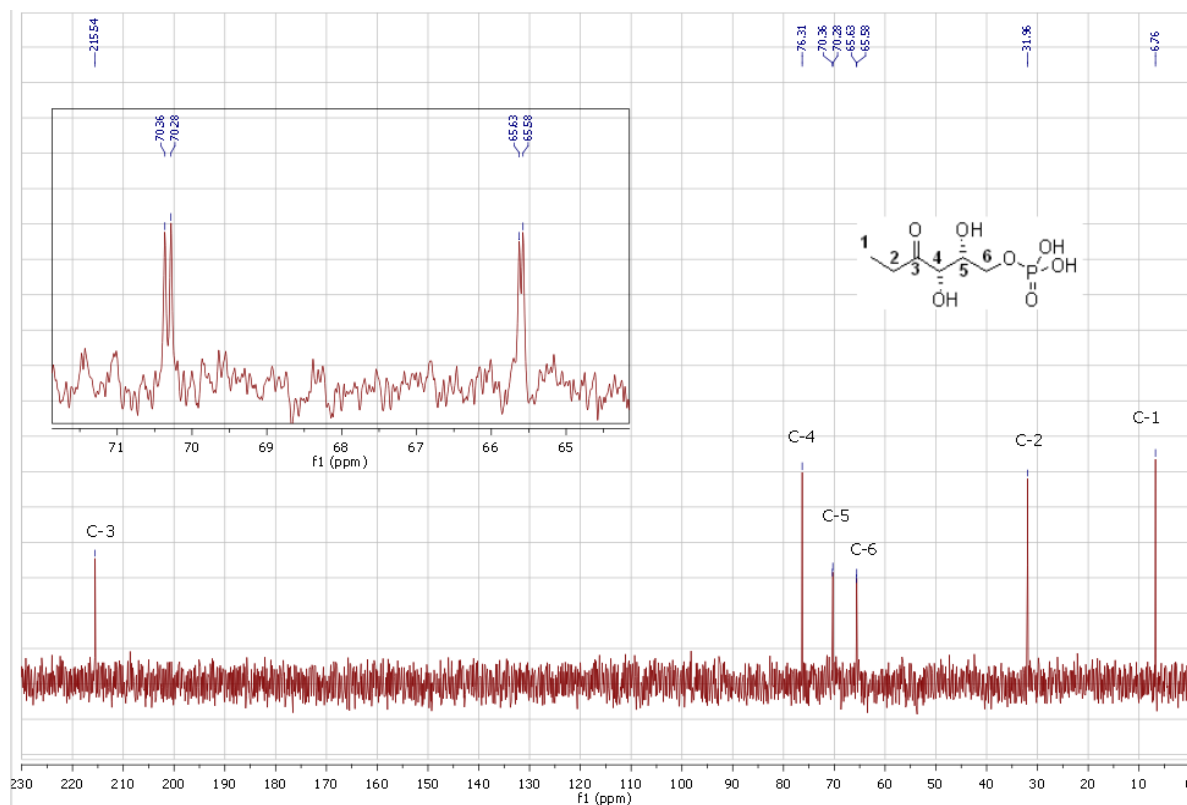

#### 5.4 D-glycero-D-altro-octulose-8-phosphate **9**

According to general procedure 1, 50 mg of D-ribose-5-phosphate disodium salt hydrate (**8**) was added to 33 mg of **1** in 3.4 mL of water. The reaction was initiated by adding 150U of FSA A129S. After workup and purification, 58 mg of compound **9** was obtained as its ammonium salt (90% yield).

According to general procedure 2, 235  $\mu$ L of a 700 mM glycolaldehyde phosphate solution in water was added to 32 mg of **1** in 3.4 mL of water. The reaction was initiated by adding 150U of FSA A129S. After workup and purification, 38.5 mg of compound **9** was obtained as its ammonium salt (66% yield).

Due to overlapping and too weak signals for minority forms, only the resonances of the  $\beta$  structure could be fully assigned ( $\alpha$  furanose,  $\beta$  furanose and linear forms were respectively noted as  $\alpha$ ,  $\beta$  and l. Pyranoses forms were noted p).

$^1\text{H}$  NMR (400 MHz,  $\text{D}_2\text{O}$ )  $\delta$  4.32 (t, 1H,  $J=7.8$  Hz, H-4 $\beta$ ), 4.05 (d, 1H,  $J=7.9$  Hz, 3 $\beta$ ), 4.00 (dd, 1H,  $J=3.8, 7.1$  Hz, H-5 $\beta$ ), 3.93-3.91 (m, 2H, H-8 $\beta$ ), 3.87-3.82 (m, 2H, H-6 $\beta$ , H-7 $\beta$ ), 3.54 (d, 1H,  $J=12.2$  Hz, H-1a $\beta$ ), 3.51 (d, 1H,  $J=12.1$ Hz, H-1b $\beta$ ).

$^{13}\text{C}$  NMR (100 MHz,  $\text{D}_2\text{O}$ )  $\delta$  104.54 (C-2 $\alpha$ ), 101.49 (C-2 $\beta$ ), 97.45 (C-2p), 80.34 (C-5 $\beta$ ), 75.75 (C-3 $\beta$ ), 74.71 (C-4 $\beta$ ), 71.18 (C-6 $\beta$ ), 71.09 (d,  $J=6.9$ Hz, C-7 $\beta$ ), 65.46 (d,  $J=4.8$ Hz, 8 $\beta$ ), 62.39 (C-1 $\beta$ ).  $^{13}\text{C}$  NMR spectrum was identical to that from the literature<sup>7</sup>.

HRMS (ESI); calculated for  $[\text{C}_8\text{H}_{17}\text{O}_{11}\text{P}-\text{H}]$ : 319.0430, found: 319.0416

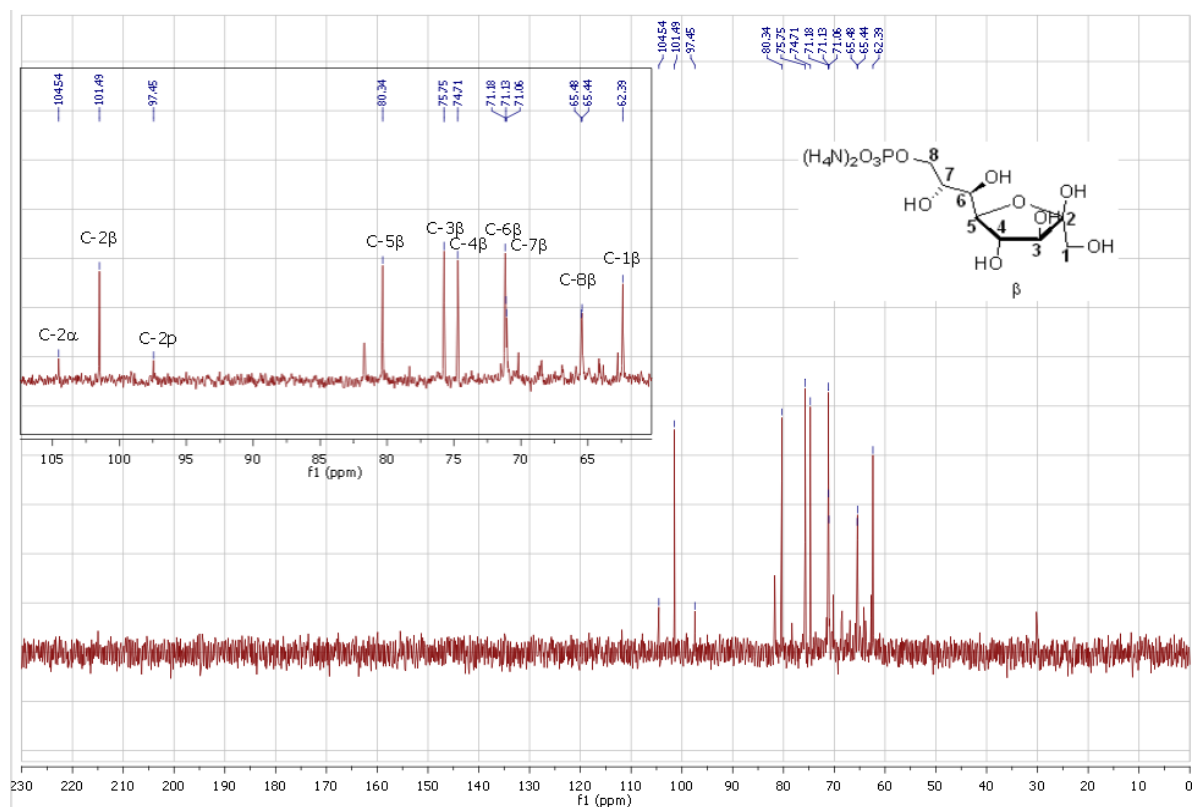

## 5.5 1-deoxy-D-glycero-D-altro-octulose-8-phosphate **10**

According to general procedure 1, 50 mg of **8** was added to 25  $\mu$ L of **2** in 3.4 mL of water. The reaction was initiated by adding 90U of wt-FSA. After workup and purification, 47 mg of compound **10** was obtained as its ammonium salt (77% yield).

Due to overlapping and too weak signals for minority forms (two pyranose forms), only the resonances of  $\alpha$  and  $\beta$  structures could be fully assigned ( $\alpha$  furanose,  $\beta$  furanose were respectively noted as  $\alpha$ ,  $\beta$ . Pyranoses forms were noted p).

<sup>1</sup>H NMR (400 MHz, D<sub>2</sub>O)  $\delta$  4.31-3.62 (m, 7H, H-3, H-4, H-5, H-6, H-7, H-8 (p $\alpha$ , p $\beta$ ,  $\alpha$ ,  $\beta$ )), 1.46 (s, 3H, H-1p $\alpha$  or H-1p $\beta$ ), 1.44 (s, 3H, H-1 $\beta$ ), 1.40 (s, 3H, H-1 $\alpha$ ), 1.35 (s, 3H, H-1p $\beta$  or p $\alpha$ ).

<sup>13</sup>C NMR (100 MHz, D<sub>2</sub>O)  $\delta$  105.19 (C-2 $\alpha$ ), 101.53 (C-2 $\beta$ ), 99.23 (C-2p), 98.03 (C-2p), 82.15 (C-3 $\alpha$  or C-5 $\alpha$ ), 81.77 (C-3 $\alpha$  or C-5 $\alpha$ ), 80.60 (C-3 $\beta$  or C-5 $\beta$ ), 80.37 (C-3 $\beta$  or C-5 $\beta$ ), 75.83 (C-4 $\alpha$ ), 74.66 (C-4 $\beta$ ), 71.40 (C-6 $\beta$ ), 71.07 (d,  $J$ =6.2Hz, C-7 $\beta$ ), 70.08 (C-6 $\alpha$ ), 68.67 (d,  $J$ =6.9Hz, C-7 $\alpha$ ), 64.96 (d,  $J$ =4.2Hz, C-8 $\beta$ ), 64.62 (d,  $J$ =4.6Hz, C-8 $\alpha$ ), 24.93 (C-1p $\alpha$  or p $\beta$ ), 23.90 (C-1p $\beta$  or p $\alpha$ ), 23.33 (C-1 $\beta$ ), 21.35 (C-1 $\alpha$ ).

HRMS (ESI); calculated for [C<sub>8</sub>H<sub>17</sub>O<sub>10</sub>P-H]: 303.0481, found: 303.0492

$[\alpha]_D^{25} = -6.5$  ( $c = 2.2$ , HCl 0.1N)



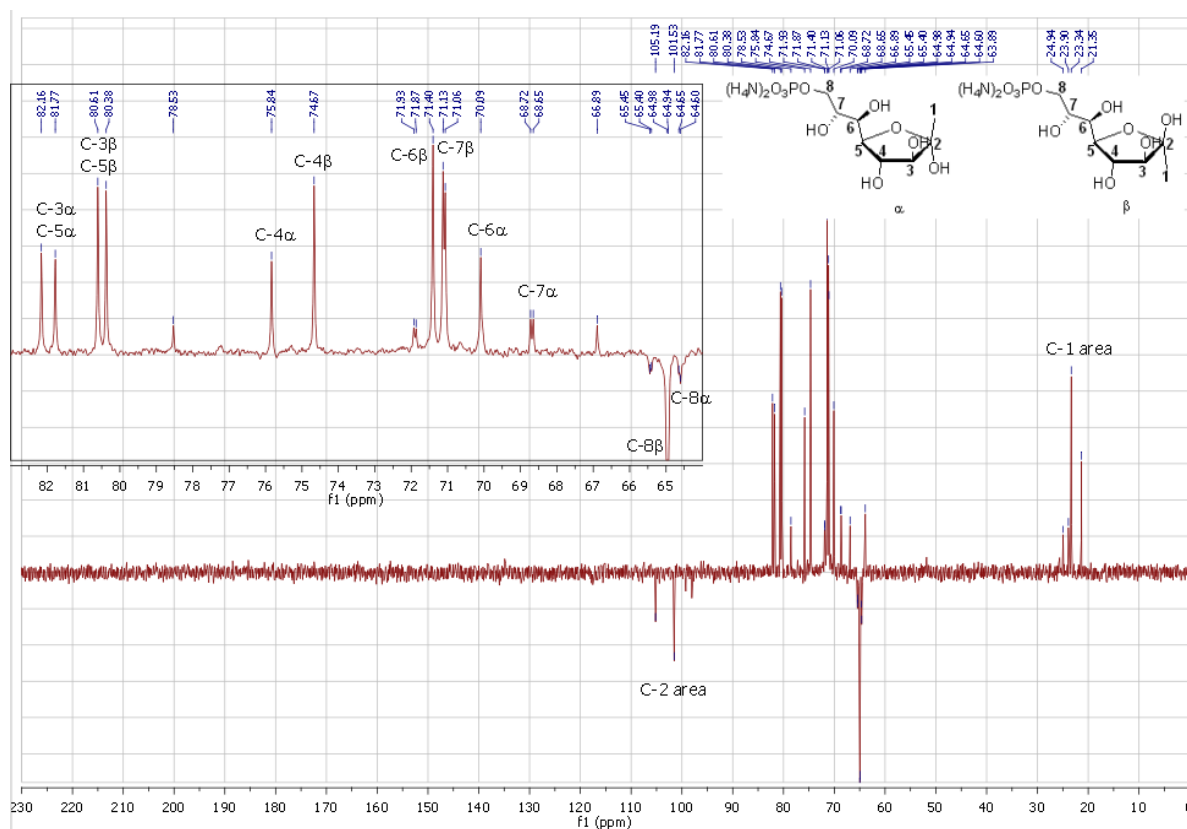

## 5.6 (2R,3R,4R,5R,6S)-2,3,4,5,6-pentahydroxy-7-oxononyl phosphate 11

According to general procedure 1, 50 mg of **8** was added to 32.6  $\mu\text{L}$  of **3** in 3.4 mL of water. The reaction was initiated by adding 90U of wt-FSA. After workup and purification, 50.5 mg of compound **11** was obtained as its ammonium salt (79% yield).

Due to overlapping and too weak signals for minority forms, only the resonances of  $\beta$  structure could be totally assigned ( $\alpha$  furanose,  $\beta$  furanose were respectively noted as  $\alpha$ ,  $\beta$ . Pyranoses and linear forms were noted p and l respectively).

$^1\text{H}$  NMR (400 MHz,  $\text{D}_2\text{O}$ )  $\delta$  3.80-4.31 (m, 7H, H-4, H-5, H-6, H-7, H-8, H-9 (l, p,  $\alpha$ ,  $\beta$ )), 1.69-1.72 (m, 2H, H-2 (l, p,  $\alpha$ ,  $\beta$ )), 0.88-1.00 (m, 3H, H-1 (l, p,  $\alpha$ ,  $\beta$ )).

$^{13}\text{C}$  NMR (100 MHz,  $\text{D}_2\text{O}$ )  $\delta$  216.19 (C-3l), 107.52 (C-3 $\alpha$ ), 103.19 (C-3 $\beta$ ), 99.51 (C-3p), 82.93 (C-6 $\alpha$ ), 80.71 (C-4 $\alpha$ ), 80.19 (C-6 $\beta$ ), 78.33 (C-4 $\beta$ ), 76.59 (C-5 $\alpha$ ), 74.68 (C-5 $\beta$ ), 71.14 (C-7 $\beta$ ), 70.90 (d,  $J=6.6$  Hz, C-8 $\beta$ ), 70.22 (C-7 $\alpha$ ), 65.38 (d,  $J=4.5$  Hz, C-9 $\beta$ ), 65.27 (d,  $J=4.4$  Hz, C-9 $\alpha$ ), 31.77 (C-2l), 29.69 (C-2 $\beta$ ), 29.40 (C-2p), 27.20 (C-2 $\alpha$ ), 7.02 (C-1 $\alpha$ ), 6.92 (C-1l), 6.82 (C-1 $\beta$ ), 6.42 (C-1p).

HRMS (ESI); calculated for  $[\text{C}_9\text{H}_{19}\text{O}_{10}\text{P-H}]$ : 317.0638, found: 317.0629

$[\alpha]_{\text{D}}^{25} = -51.2$  ( $c=2$ , HCl 0.1N)

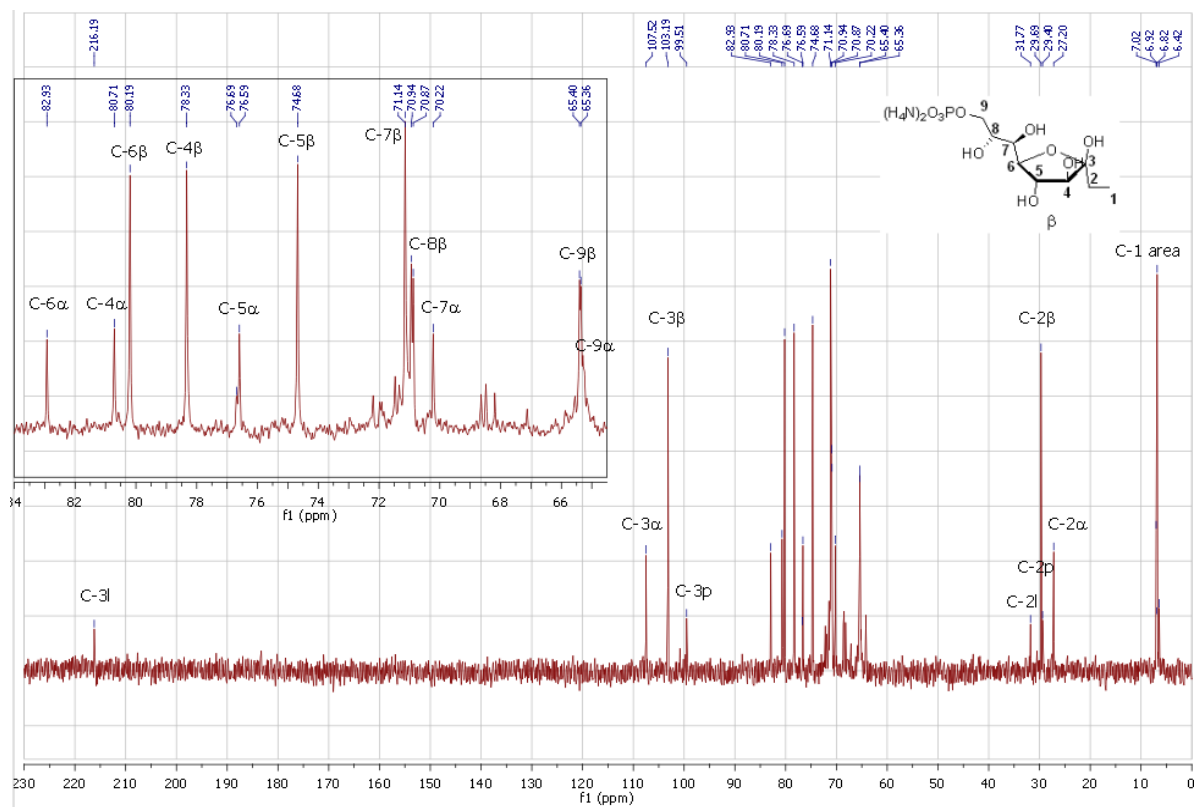

## 6 Scheme illustrating arabinose-5-phosphate conversion by FSA wild-type

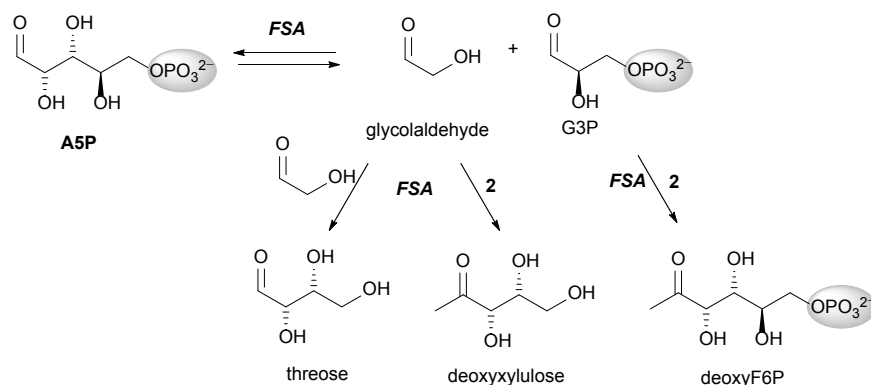

Arabinose-5-phosphate (A5P), C-2 epimer of **8**, was not acceptor substrate of FSA wild-type. Indeed when using 1 equivalent of A5P per equivalent of **2**, the TLC analysis of reaction mixture aliquots between 15 min to 24h invariably showed formation of deoxyfructose-6-phosphate (dF6P) and deoxyxylulose along with D-threose. This was due to the ability of FSA to cleave A5P into D-G3P and glycolaldehyde via a retroaldol reaction. Thereby dF6P resulted from the aldol addition of **2** to D-G3P, whereas glycolaldehyde either reacted in a self-aldolisation reaction to D-threose or reacted as acceptor with **2** as donor to furnish deoxyxylulose.

## 7 References

- <sup>1</sup> J. A. Castillo, C. Guérard-Hélaine, M. Gutiérrez, X. Garrabou, M. Sancelme, M. Schürmann, T. Inoue, V. Hélaine, F. Charmantray, T. Gefflaut, L. Hecquet, J. Joglar, P. Clapès, G. A. Sprenger and M. Lemaire, *Adv. Synth. Catal.* 2010, **352**, 1039-1046.
- <sup>2</sup> S. Schneider, M. Gutierrez, T. Sandalova, G. Schneider, P. Clapès, G. A. Sprenger and A. K. Samland *ChemBioChem*, 2010, **11**, 5, 681-690.
- <sup>3</sup> M. Awada and P. C. Dedon, *Chem. Res. Toxicol.* 2001, **14**, 1247-1253.
- <sup>4</sup> M. Schurmann, G.A. Sprenger *J. Biol Chem.*, 2001, **14**, 11055-61
- <sup>5</sup> T. Wood, *Anal. Biochem.* 1970, **33**, 297-306.
- <sup>6</sup> F. T. Zimmermann, A. Schneider, U. Schörken, G. A. Sprenger and W.-D. Fessner, *Tetrahedron: Asymmetry*, 1999, **10**, 1643-1646.
- <sup>7</sup> M. Kapuscinski, F. P. Franke, I. Flanigan, J. K. MacLeod and J. F. Williams, *Carb. Res.*, 1985, **140**, 69-79.
